# Supplementary material for: Polymer defect engineering – conductive 2D organic platelets from precise thiophene-doped polyethylene
Source: Royal Society of Chemistry journal article supplement (doi:10.1039/d1py00117e), 2021-01-01
Supplement: d1py00117e1.pdf [file d1py00117e1.pdf]

**Polymer defect engineering – conductive 2D organic platelets from precise  
thiophene-doped polyethylene**

Oksana Suraeva,<sup>a</sup> Beomjin Jeong,<sup>a</sup> Kamal Asadi,<sup>a</sup> Katharina Landfester,<sup>a</sup> Frederik R.  
Wurm<sup>\*,a,b</sup>, Ingo Lieberwirth<sup>\*,a</sup>

*a Max Planck Institute for Polymer Research, Ackermannweg 10, 55128 Mainz,  
Germany, [lieberwirth@mpip-mainz.mpg.de](mailto:lieberwirth@mpip-mainz.mpg.de)*

*b Sustainable Polymer Chemistry Group, MESA+ Institute for Nanotechnology, Faculty  
of Science and Technology, Universiteit Twente, PO Box 217, 7500 AE Enschede, The  
Netherlands; [frederik.wurm@utwente.nl](mailto:frederik.wurm@utwente.nl)*

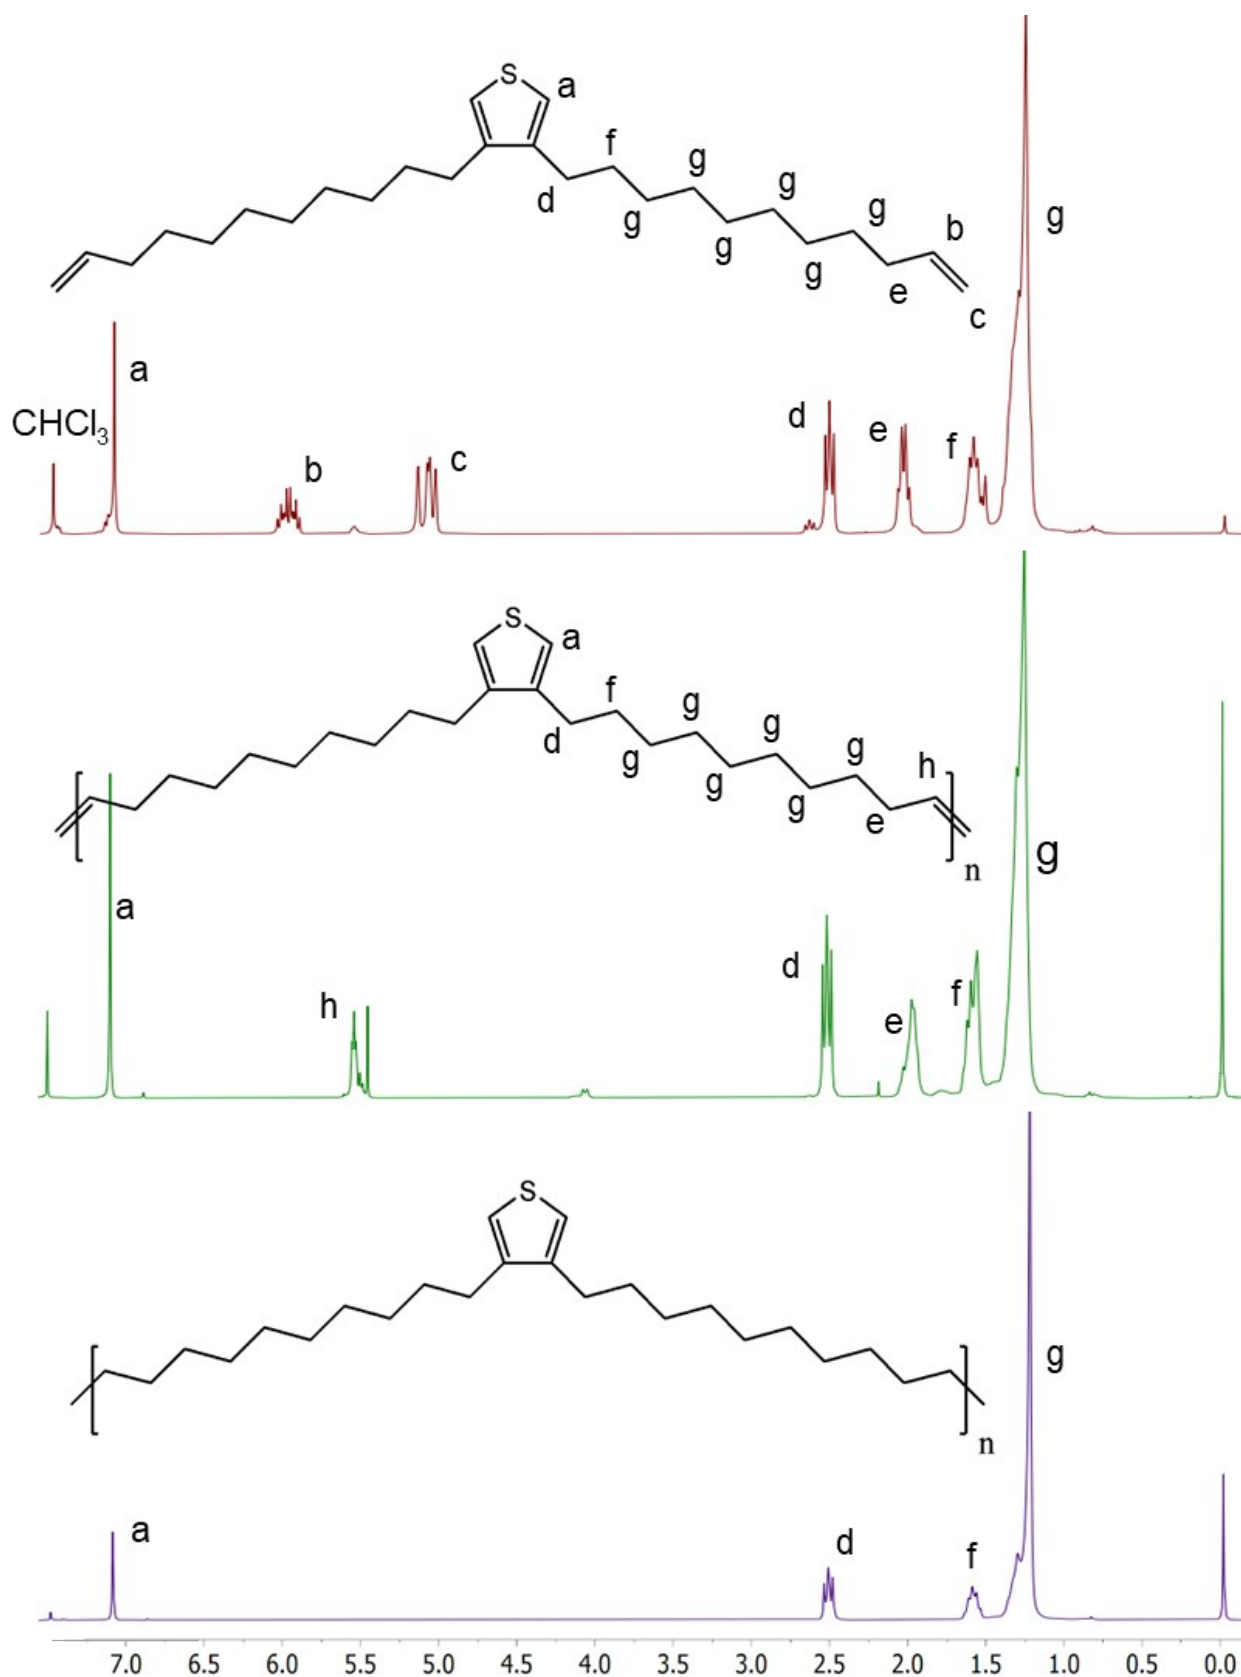

**Figure S1.**  $^1\text{H}$  NMR spectra of TH20-m, TH20 and TH20-H

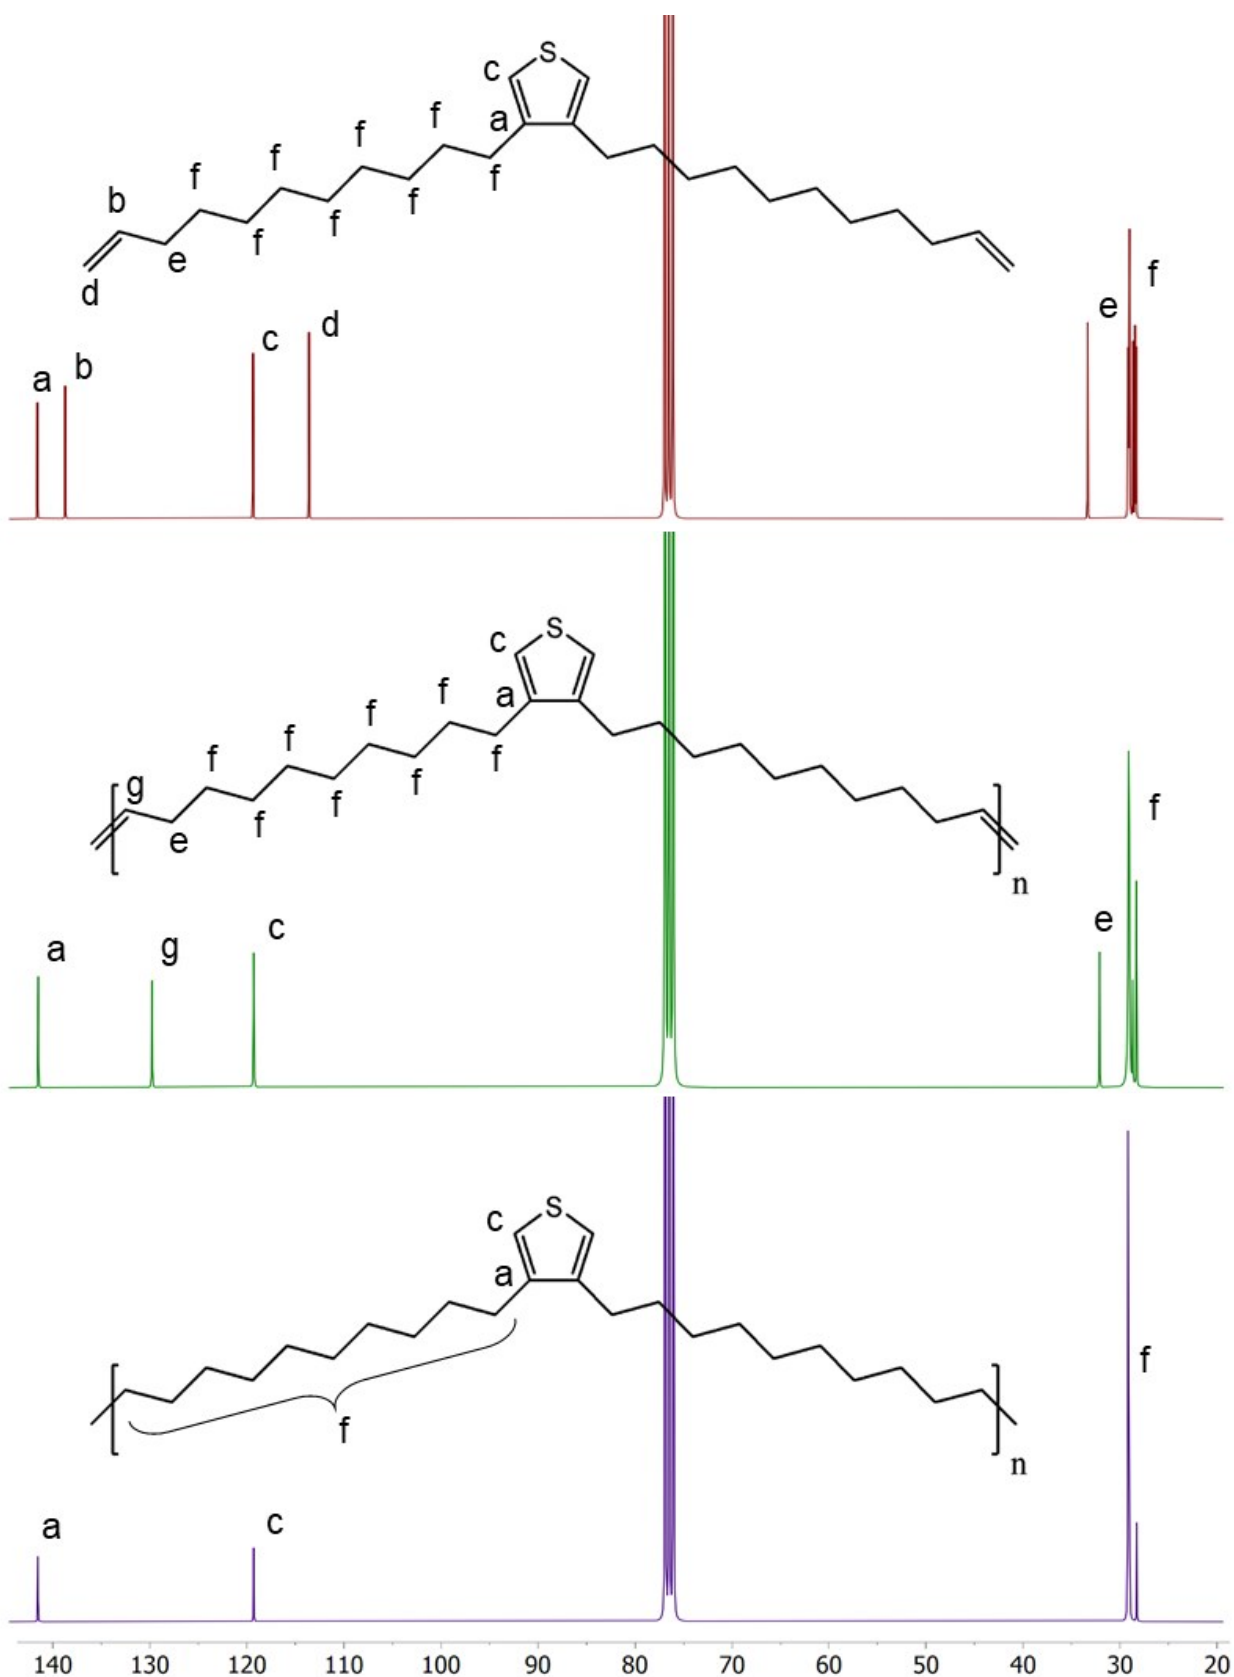

**Figure S2.**  $^{13}\text{C}$  NMR spectra of TH20-m, TH20 and TH20-H

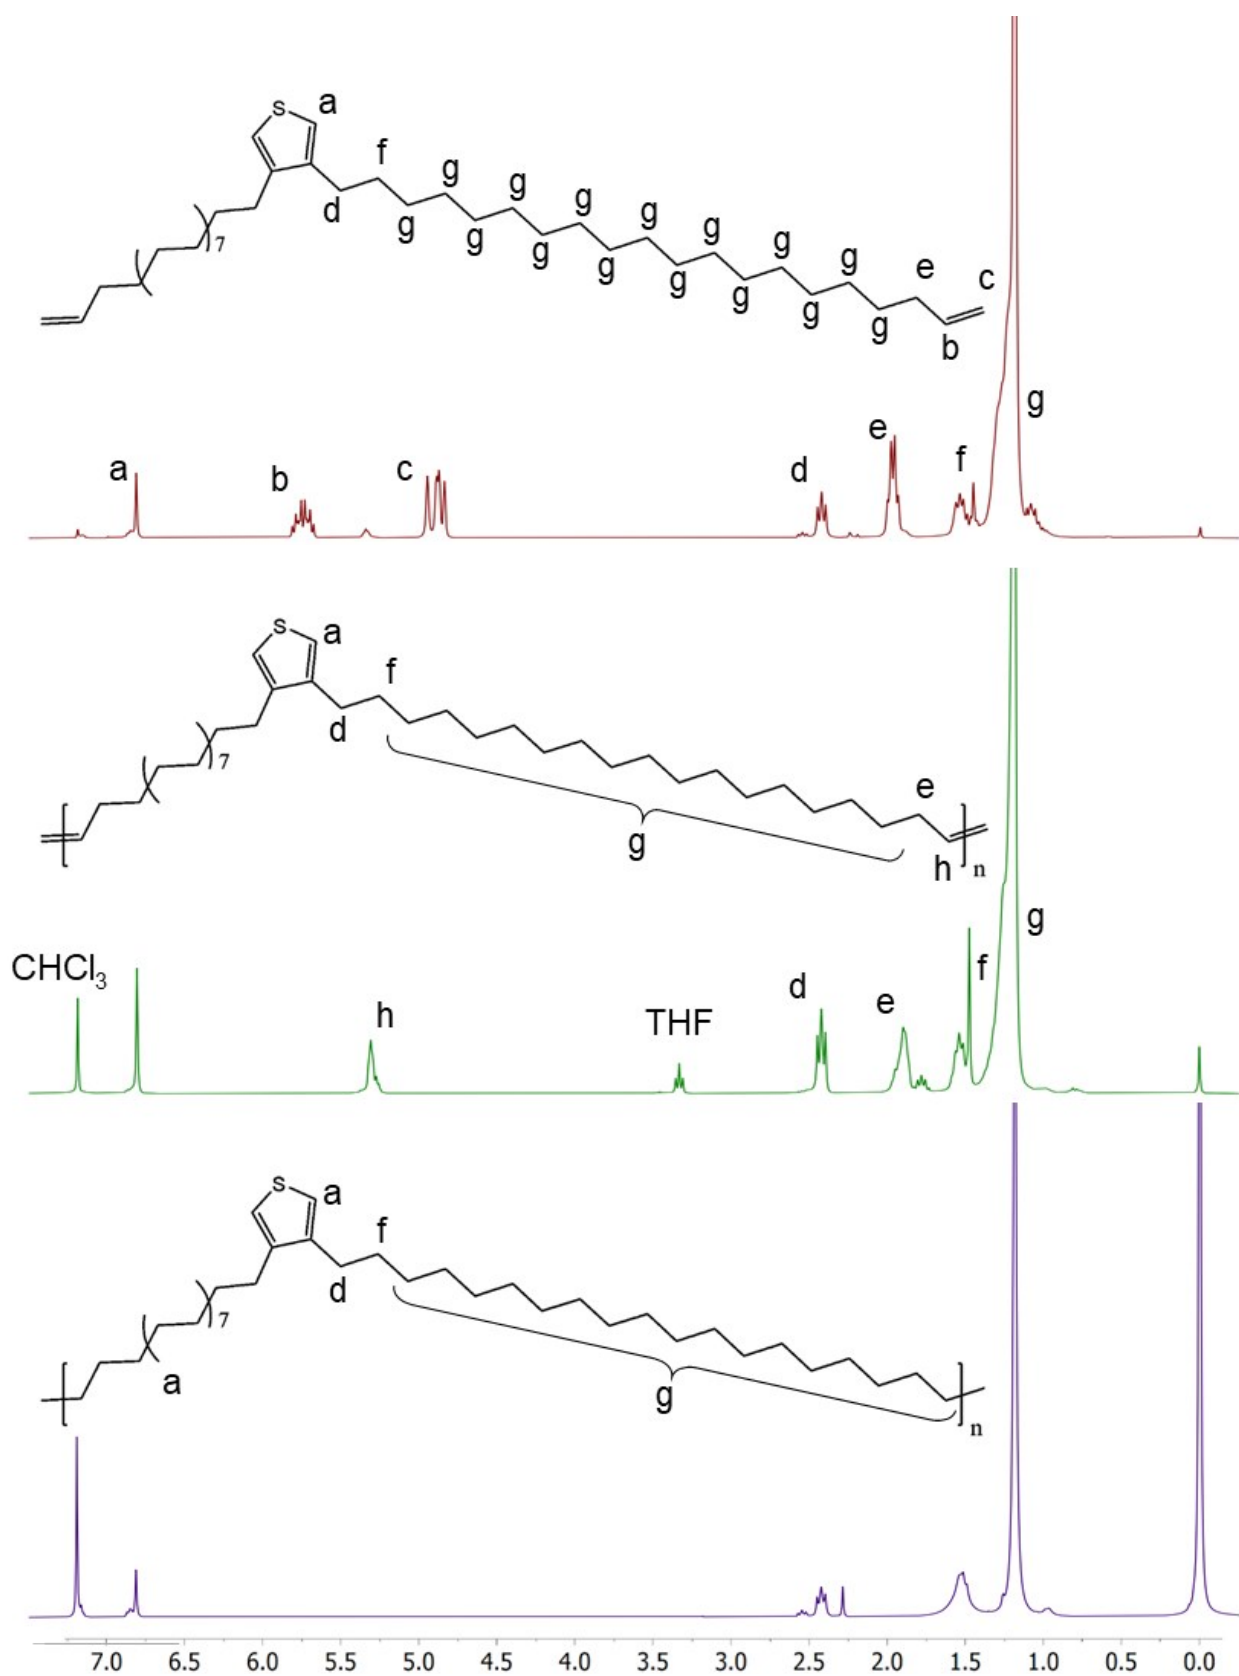

**Figure S3.**  $^1\text{H}$  NMR spectra of TH38-m, TH38 and TH38-H

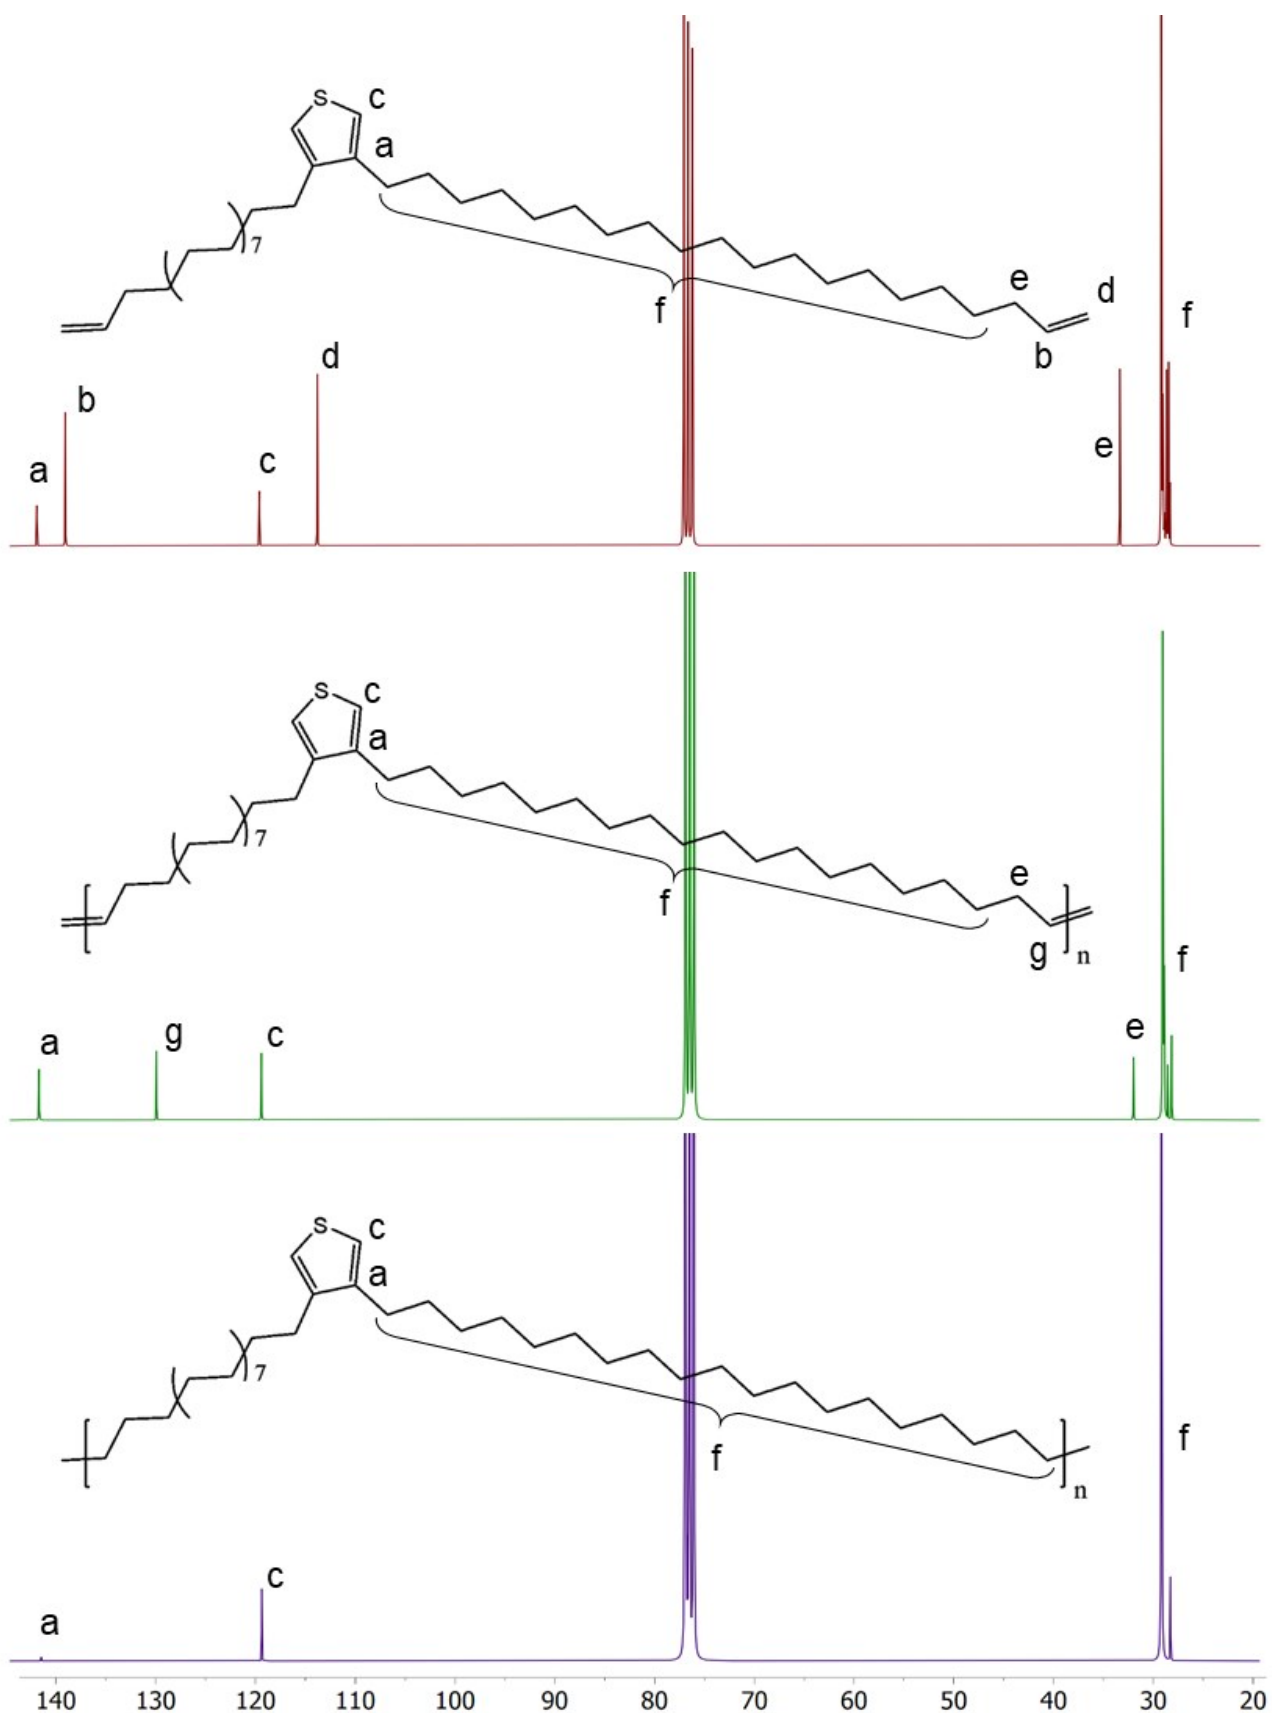

**Figure S4.**  $^{13}\text{C}$  NMR spectra of TH38-m, TH38 and TH38-H

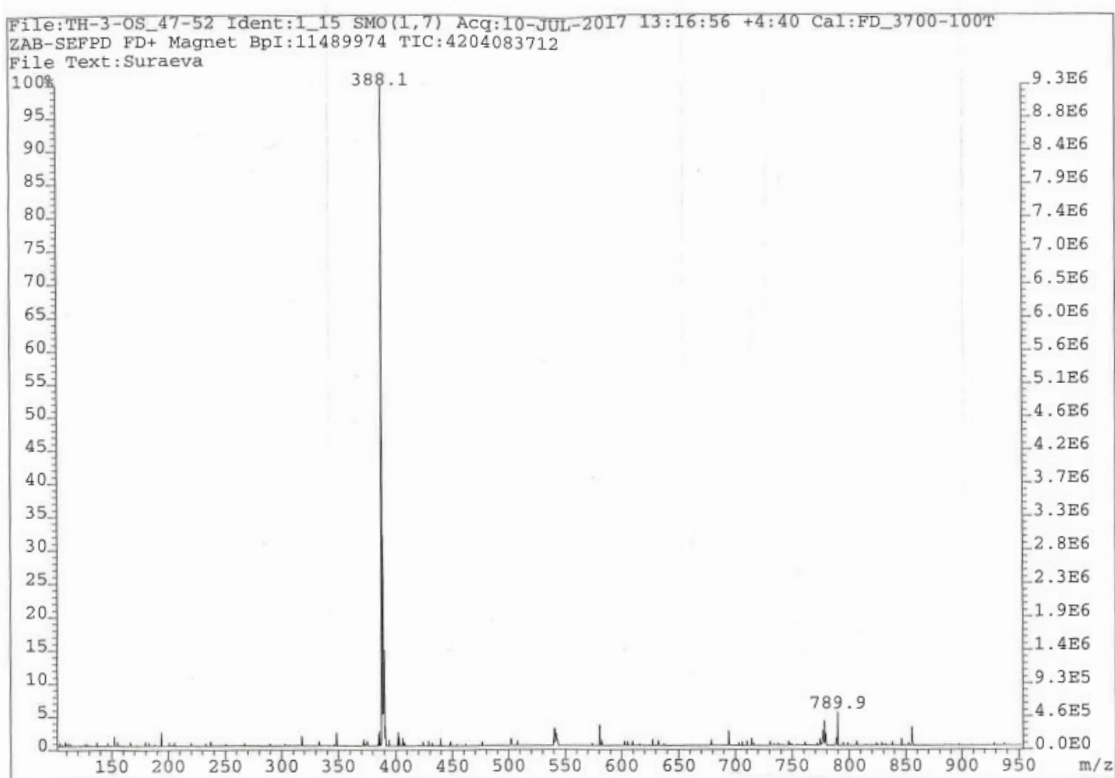

**Figure S5.** Mass-spectrum of monomer TH20-m

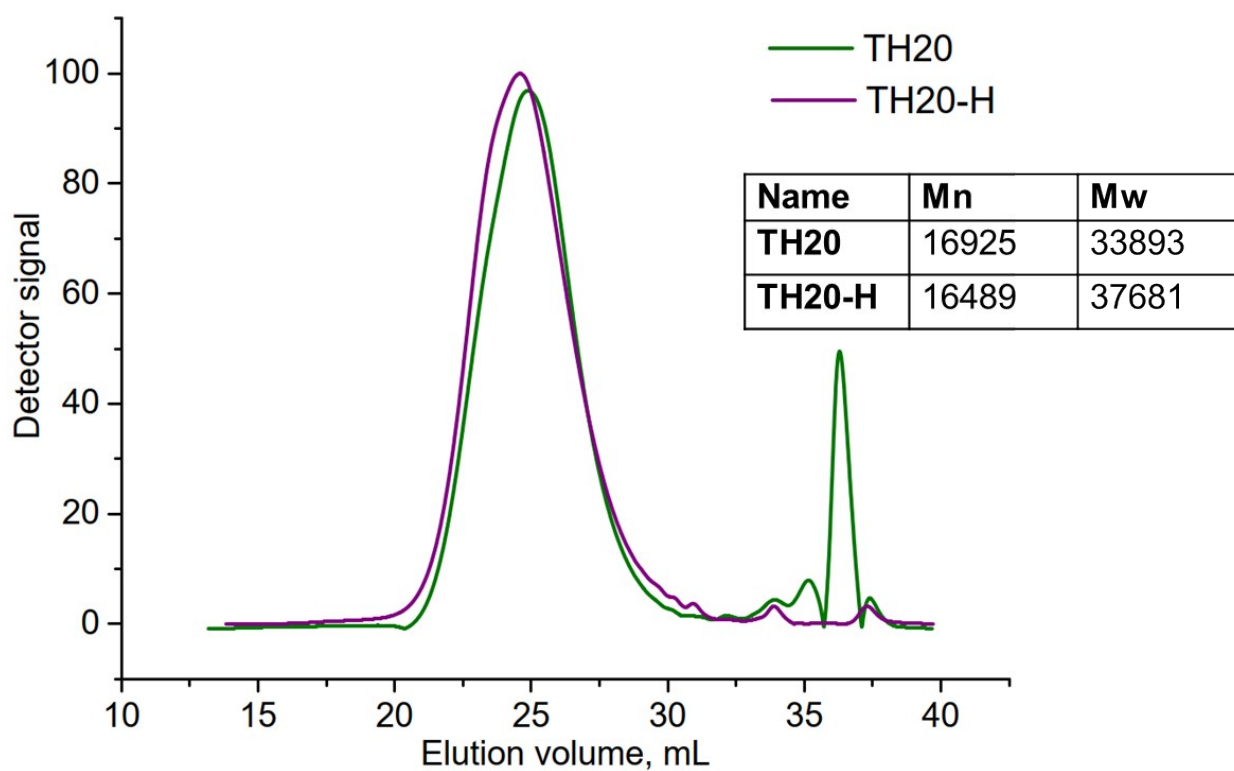

**Figure S6.** GPC curves of unsaturated polymer TH20 (green), and polymer TH20-H (purple) after hydrogenation

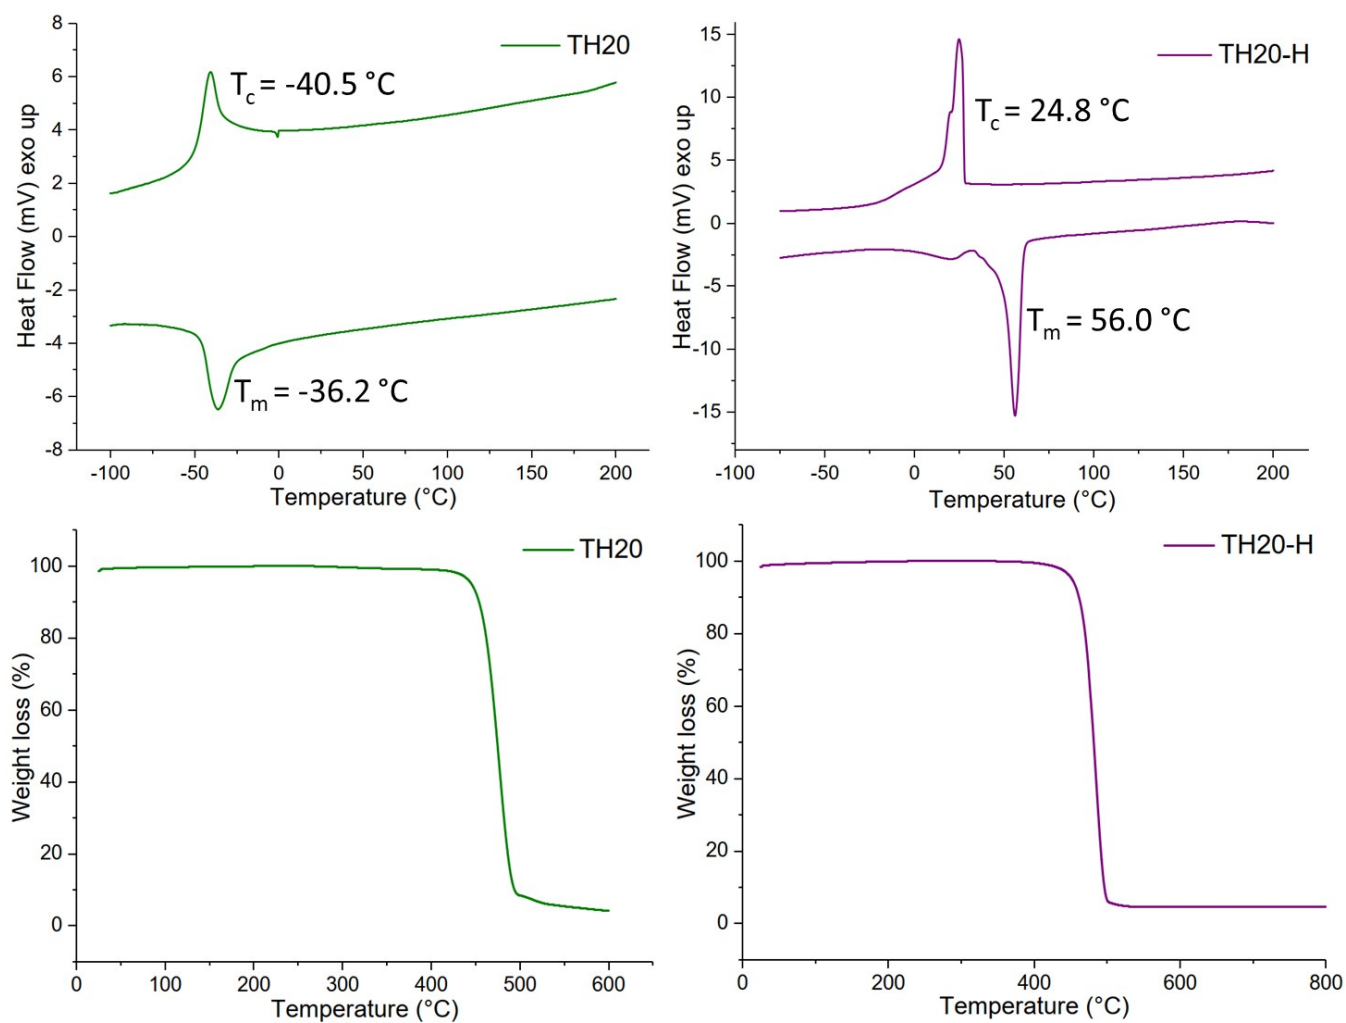

**Figure S7.** DSC thermograms of unsaturated polymer TH20 and product after hydrogenation TH20-H.

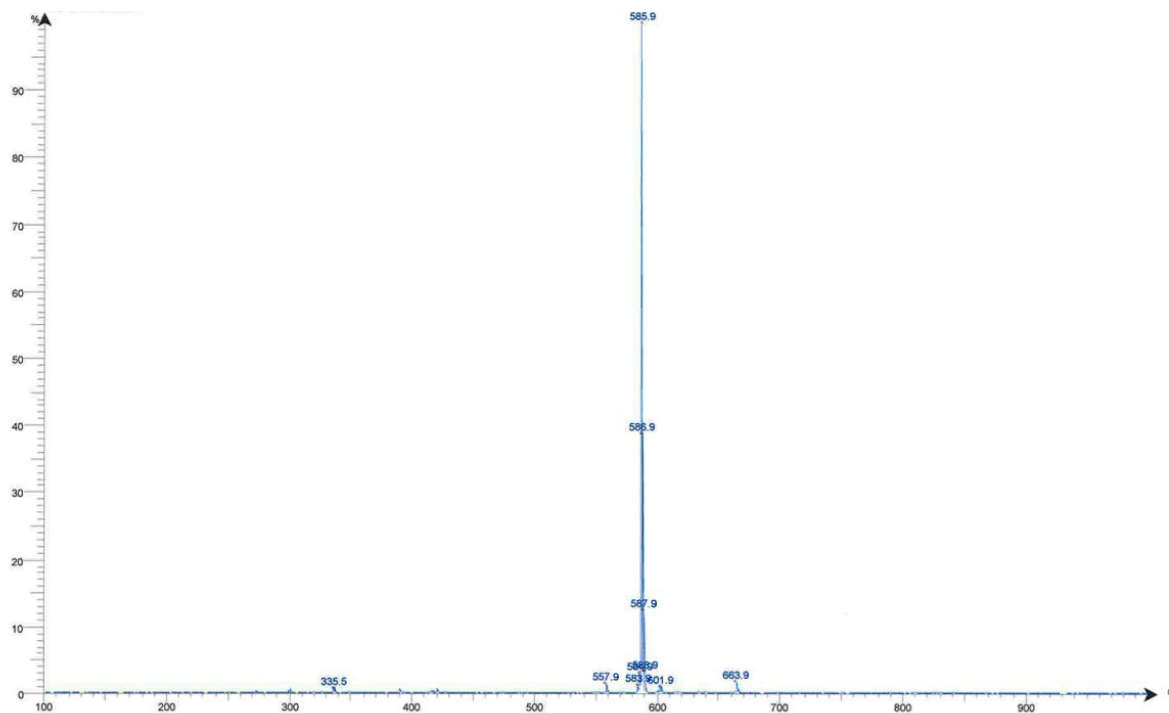

**Figure S8.** Mass-spectrum of monomer TH38-m

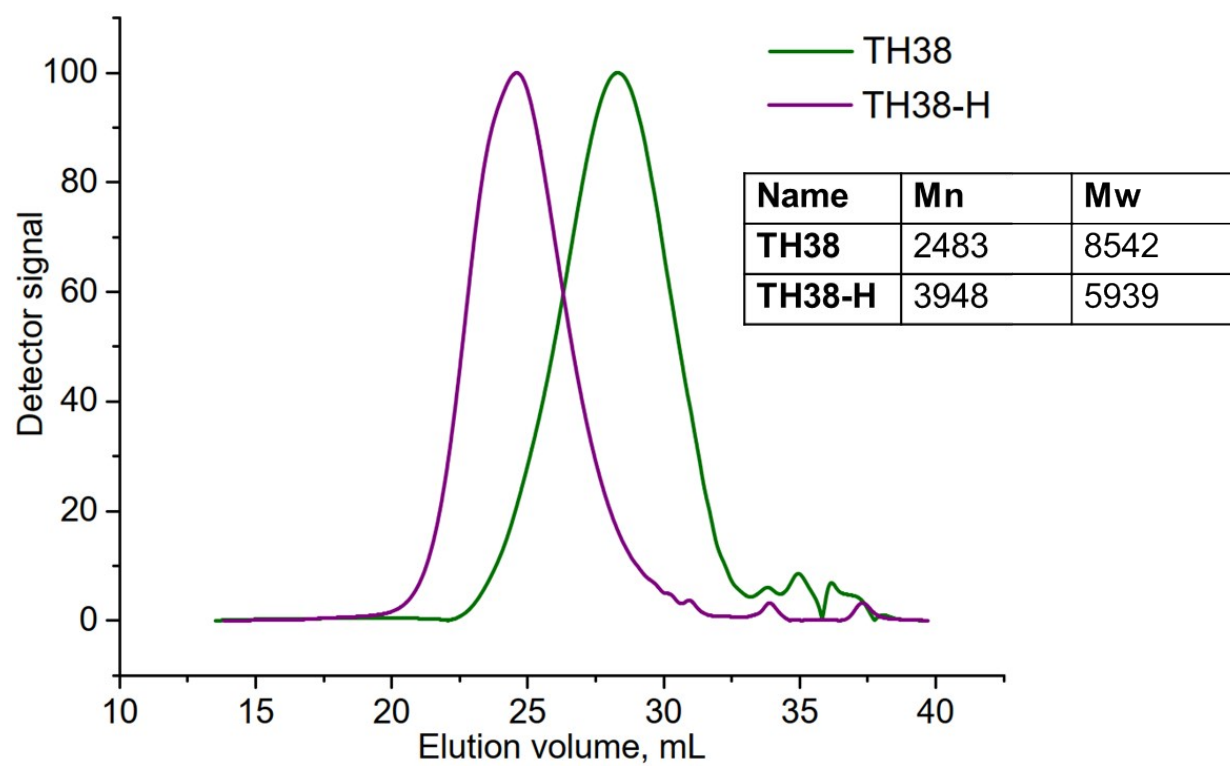

**Figure S9.** GPC curves of unsaturated polymer TH20 (green), and polymer TH20-H (purple) after hydrogenation



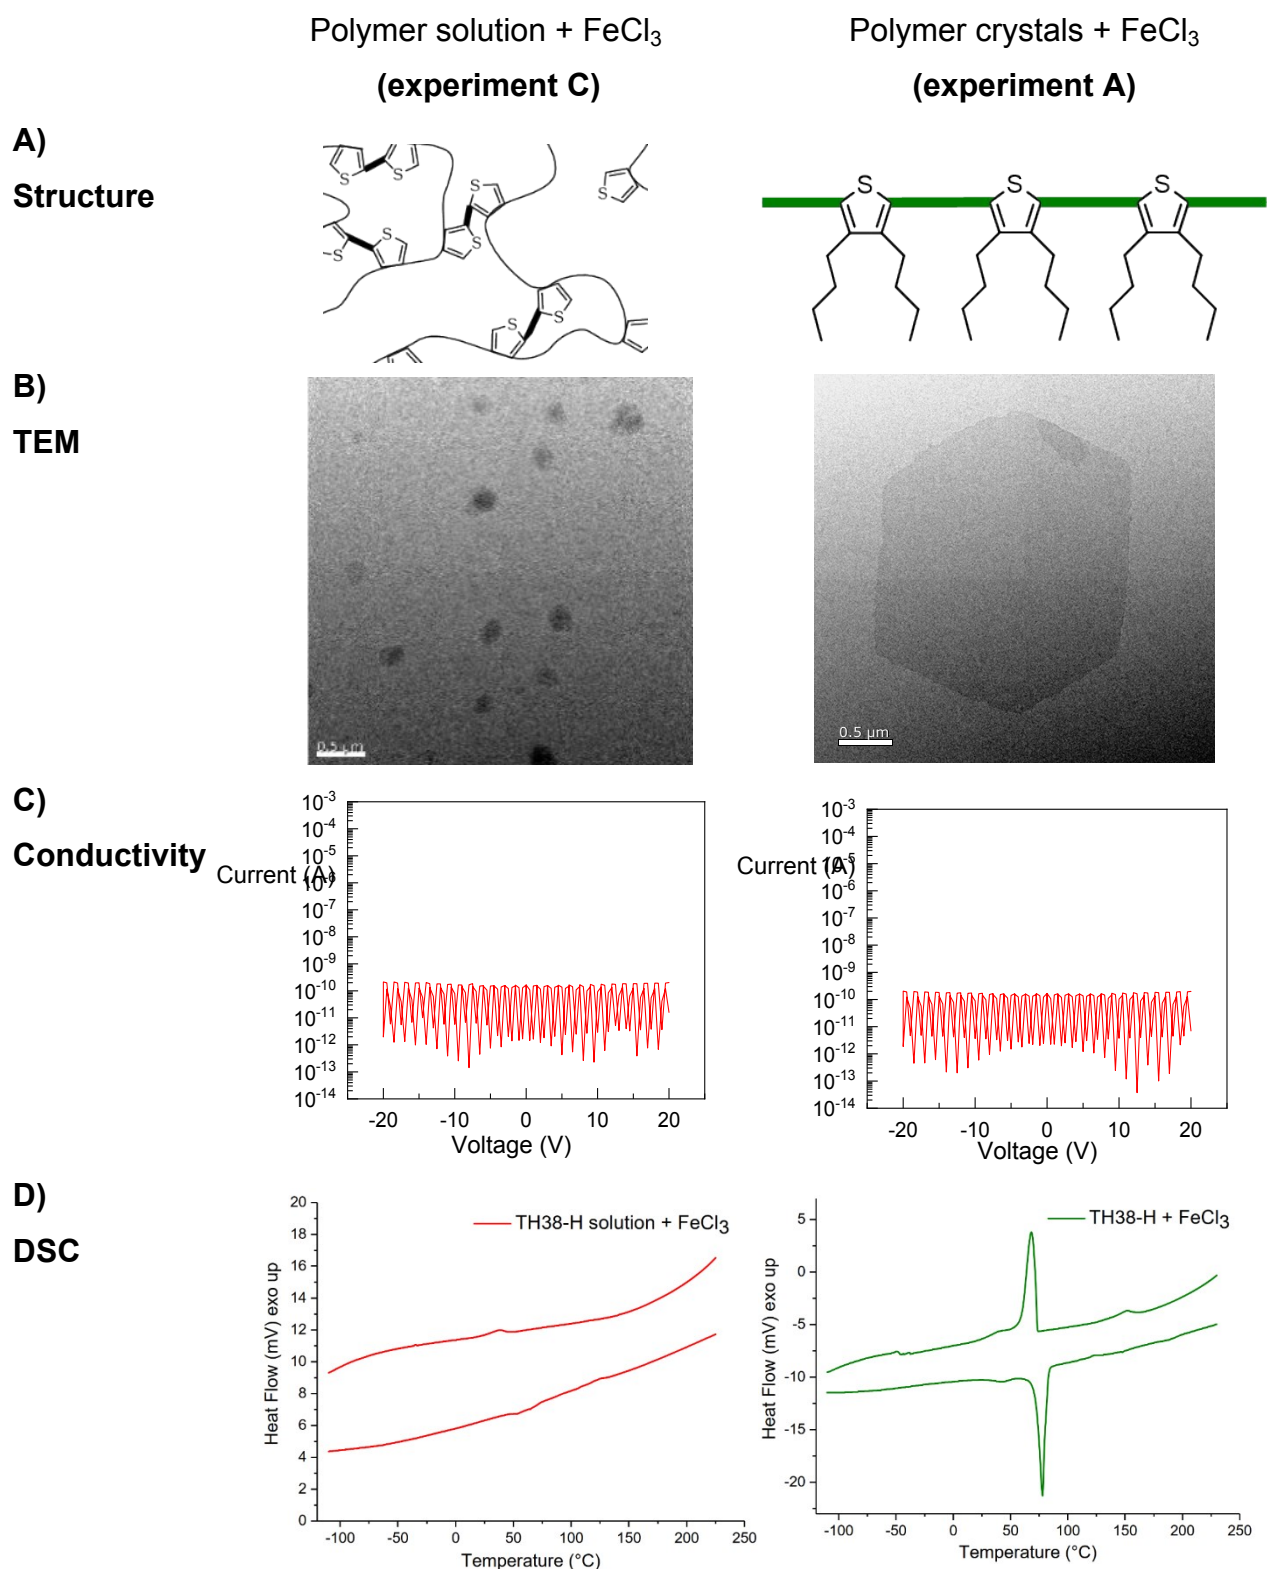

**Figure S10.** Structure (A), TEM bright-field micrograph (B), conductivity (C) and DSC thermograms (D) of polymer TH38-H after electrochemical polymerization in solution (left) in crystal state (right)

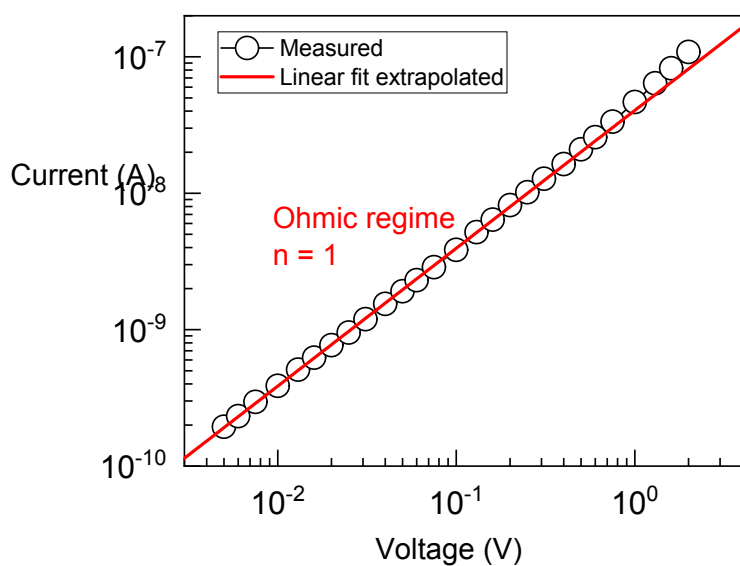

**Figure S11.** Log I-Log V plot at low bias regime to prove Ohmic electrical conduction of the polymer TH38-H after electrochemical polymerization in crystal state with addition of EDOT

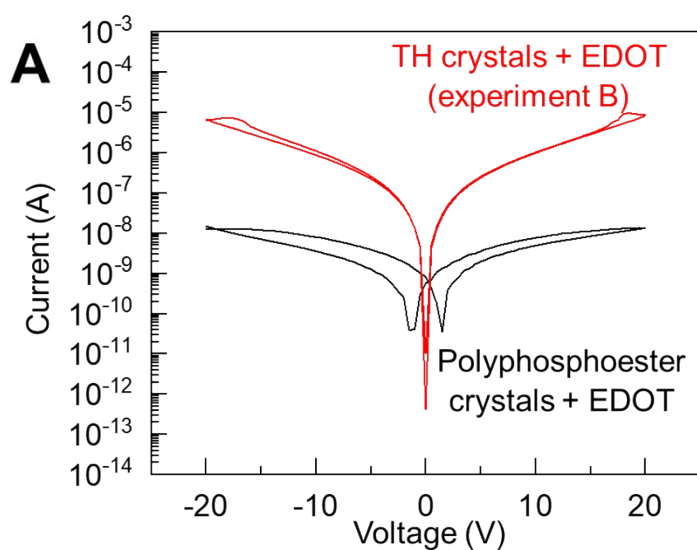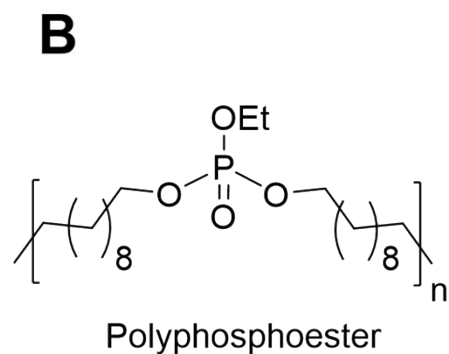

**Figure S12.** (A) “Negative control” experiment. Polyphosphoester crystals after reaction with EDOT in the presence of FeCl<sub>3</sub> (black curve) do not reveal conductivity compare to thiophene crystals with conductive surface (red curve). (B) Chemical structure of polyphosphoester polymer.
